# Supplementary material for: Deep learning-based auto-delineation of gross tumour volumes and involved nodes in PET/CT images of head and neck cancer patients
Source: PubMed Central journal article supplement (PMC8263429; doi:10.1007/s00259-020-05125-x), 2021-02-09
Supplement: 259_2020_5125_MOESM1_ESM.pdf [file 259_2020_5125_MOESM1_ESM.pdf]

---

# Deep learning based auto-delineation of gross tumour volumes and involved nodes in PET/CT images of head and neck cancer patients

Yngve Mardal Moe · Aurora Rosvoll Groendahl · Oliver Tomic · Einar Dale · Eirik Malinen · Cecilia Marie Futsaether

## A Supplementary material

### A.1 Dataset statistics

Table A1 shows patient characteristics for the entire patient cohort and the patients included in the training, validation and test cohorts. In addition, Table A2 shows summary statistics for the distribution of structure sizes in the ground truth for the three cohorts. Table A3 shows summary statistics for the number of structures in the ground truth for each patient in the cohorts.

### A.2 Architecture

Table A4 shows the architecture of the neural networks. All convolutional layers except the last and all up-convolutional (transposed strided convolution) layers consisted of a  $(3 \times 3)$ - (up-)convolution, followed by a ReLU activation function and finally a batch normalisation layer. Up-convolutional layers also included a bilinear interpolation layer after batch normalisation to match the layer before downsampling. The final convolutional layer consisted of a  $(1 \times 1)$ -convolution followed by a sigmoidal activation function. All convolutional and up-convolutional layers included a bias-term for each output channel and all convolution-weights were initialised using the normally distributed He-scheme. The code for the experiments are available on GitHub: <https://github.com/yngvem/EJNMMI-2020>.

**Table A1** Patient characteristics.

| Characteristic <sup>a</sup>               | All patients<br>( <i>n</i> = 197) | Train<br>( <i>n</i> = 142) | Validation<br>( <i>n</i> = 15) | Test<br>( <i>n</i> = 40) |
|-------------------------------------------|-----------------------------------|----------------------------|--------------------------------|--------------------------|
| <b>Age [years]</b>                        |                                   |                            |                                |                          |
| Mean                                      | 60.3                              | 60.7                       | 58.8                           | 59.4                     |
| Range                                     | 39.9–79.1                         | 39.9–79.1                  | 43.2–73.7                      | 43.0–77.0                |
| <b>Sex</b>                                |                                   |                            |                                |                          |
| Female                                    | 24.9 %                            | 25.4 %                     | 13.3 %                         | 27.5 %                   |
| Male                                      | 75.1 %                            | 74.7 %                     | 86.7 %                         | 72.5 %                   |
| <b>TNM<sup>b</sup></b>                    |                                   |                            |                                |                          |
| T1                                        | 9.1 %                             | 9.2 %                      | 6.7 %                          | 10.0 %                   |
| T2                                        | 39.6 %                            | 39.4 %                     | 40.0 %                         | 40.0 %                   |
| T3                                        | 23.4 %                            | 23.9 %                     | 20.0 %                         | 22.5 %                   |
| T4                                        | 27.9 %                            | 27.5 %                     | 33.3 %                         | 27.5 %                   |
| N0                                        | 23.9 %                            | 25.4 %                     | 6.7 %                          | 25.0 %                   |
| N1                                        | 11.7 %                            | 12.0 %                     | 13.3 %                         | 10.0 %                   |
| N2                                        | 60.9 %                            | 58.5 %                     | 80 %                           | 62.5 %                   |
| N3                                        | 3.6 %                             | 4.2 %                      | 0 %                            | 2.5 %                    |
| <b>AJCC/UICC<sup>b</sup> stage</b>        |                                   |                            |                                |                          |
| I                                         | 1.0 %                             | 1.4 %                      | 0 %                            | 0 %                      |
| II                                        | 8.6 %                             | 9.2 %                      | 0 %                            | 10.0 %                   |
| III                                       | 19.8 %                            | 19.7 %                     | 20.0 %                         | 20.0 %                   |
| IV                                        | 70.1 %                            | 69.0 %                     | 80.0 %                         | 70.0 %                   |
| <b>Tumour site</b>                        |                                   |                            |                                |                          |
| Oral cavity                               | 8.6 %                             | 7.0 %                      | 26.7 %                         | 7.5 %                    |
| Oropharynx                                | 72.6 %                            | 73.2 %                     | 60.0 %                         | 75.0 %                   |
| Hypopharynx                               | 8.1 %                             | 9.2 %                      | 13.3 %                         | 2.5 %                    |
| Larynx                                    | 10.7 %                            | 10.1 %                     | 0 %                            | 15.0 %                   |
| <b>GTV-T<sup>c</sup> [cm<sup>3</sup>]</b> |                                   |                            |                                |                          |
| Mean                                      | 25.0                              | 23.9                       | 37.3                           | 24.3                     |
| Range                                     | 0.8–285.0                         | 0.8–285.0                  | 2.6–247.2                      | 1.4–157.6                |
| <b>GTV-N<sup>d</sup> [cm<sup>3</sup>]</b> |                                   |                            |                                |                          |
| Mean                                      | 19.3                              | 26.6                       | 37.4                           | 19.5                     |
| Range                                     | 0.5–276.7                         | 0.5–276.7                  | 2.6–247.2                      | 0.5–76.4                 |

<sup>a</sup> Percentages may not sum to exactly 100 due to rounding.

<sup>b</sup> 7<sup>th</sup> edition

<sup>c</sup> Gross primary tumour volume

<sup>d</sup> Involved nodal volume (for patients with nodal stage  $\geq$  N1)

**Table A2** Summary statistics for structure sizes.

|                    |                    | Cohort |            |      |
|--------------------|--------------------|--------|------------|------|
|                    |                    | Train  | Validation | Test |
| Mean               | [cm <sup>3</sup> ] | 17     | 22         | 16   |
| Standard deviation | [cm <sup>3</sup> ] | 31     | 43         | 24   |
| 25% percentile     | [cm <sup>3</sup> ] | 2.2    | 2.3        | 2.3  |
| Median             | [cm <sup>3</sup> ] | 7.2    | 6.3        | 6.2  |
| 75% percentile     | [cm <sup>3</sup> ] | 18     | 27         | 21   |
| Min                | [cm <sup>3</sup> ] | 0.10   | 0.35       | 0.31 |
| Max                | [cm <sup>3</sup> ] | 28     | 25         | 17   |

**Table A3** Summary statistics for the number of structures per patient.

|                    | Cohort |            |      |
|--------------------|--------|------------|------|
|                    | Train  | Validation | Test |
| Mean               | 2.5    | 2.3        | 2.3  |
| Standard deviation | 1.4    | 0.86       | 1.2  |
| 25% percentile     | 2.0    | 2.0        | 1.0  |
| Median             | 2.0    | 2.0        | 2.0  |
| 75% percentile     | 3.0    | 3.0        | 3.0  |
| Min                | 1.0    | 1.0        | 1.0  |
| Max                | 10     | 4.0        | 6.0  |

**Table A4** Model architecture.

| Name      | Inputs          | Output shape               |
|-----------|-----------------|----------------------------|
| Conv1     | Dataset         | $191 \times 265 \times 64$ |
| Conv2     | Conv1           | $191 \times 265 \times 64$ |
| MaxPool1  | Conv2           | $95 \times 132 \times 64$  |
| Conv3     | MaxPool1        | $95 \times 132 \times 128$ |
| Conv4     | Conv3           | $95 \times 132 \times 128$ |
| MaxPool2  | Conv4           | $47 \times 66 \times 128$  |
| Conv5     | MaxPool2        | $47 \times 66 \times 256$  |
| Conv6     | Conv5           | $47 \times 66 \times 256$  |
| MaxPool3  | Conv6           | $23 \times 33 \times 256$  |
| Conv7     | MaxPool3        | $23 \times 33 \times 512$  |
| Conv8     | Conv7           | $23 \times 33 \times 512$  |
| MaxPool4  | Conv8           | $11 \times 16 \times 512$  |
| Conv9     | MaxPool4        | $11 \times 16 \times 1024$ |
| Conv10    | Conv9           | $11 \times 16 \times 1024$ |
| UpConv1   | Conv10          | $23 \times 33 \times 512$  |
| Conv11    | UpConv1 & Conv8 | $23 \times 33 \times 512$  |
| Conv12    | Conv11          | $23 \times 33 \times 512$  |
| UpConv2   | Conv12          | $47 \times 66 \times 256$  |
| Conv13    | UpConv2 & Conv6 | $47 \times 66 \times 256$  |
| Conv14    | Conv13          | $47 \times 66 \times 256$  |
| UpConv3   | Conv14          | $95 \times 132 \times 128$ |
| Conv15    | UpConv3 & Conv4 | $95 \times 132 \times 128$ |
| Conv16    | Conv15          | $95 \times 132 \times 128$ |
| UpConv4   | Conv16          | $191 \times 265 \times 64$ |
| Conv17    | UpConv4 & Conv2 | $191 \times 265 \times 64$ |
| Conv18    | Conv17          | $191 \times 265 \times 64$ |
| FinalConv | Conv18          | $191 \times 265 \times 1$  |
